# Supplementary material
Source: MDPI journal article supplement (https://www.mdpi.com/1424-8247/13/12/431)
Supplement: s1 [file s1]

**Table 3S.** Results obtained in the LDA and compound classification according to the DF. Active training group.

| Compound      | PHIA   | SH <sub>tCH</sub> | S <sub>=N-</sub> | S <sub>&gt;N-</sub> | <sup>4</sup> C <sub>C</sub> | FD      | Prob. | Clas. |
|---------------|--------|-------------------|------------------|---------------------|-----------------------------|---------|-------|-------|
| Grepafloxacin | 4.269  | 15.1468           | 0                | 3.8448              | 0                           | 25.2710 | 1.000 | +     |
| Norfloxacin   | 4.3595 | 14.4949           | 0                | 3.6034              | 0                           | 14.5309 | 1.000 | +     |
| Clinafloxacin | 4.0096 | 14.7581           | 0                | 3.4961              | 0                           | 25.0192 | 1.000 | +     |
| Enoxacin      | 4.312  | 14.4324           | 0                | 3.3811              | 0                           | 15.4349 | 1.000 | +     |
| Levofloxacin  | 4.245  | 14.9837           | 0                | 5.8165              | 0                           | 12.9508 | 1.000 | +     |
| Lomefloxacin  | 4.7868 | 15.1927           | 0                | 2.9493              | 0                           | 22.1550 | 1.000 | +     |
| Moxifloxacin  | 4.6366 | 15.3202           | 0                | 3.803               | 0                           | 22.2894 | 1.000 | +     |
| Pradofloxacin | 4.367  | 15.2491           | 0                | 3.608               | 0                           | 26.5334 | 1.000 | +     |
| Ulifloxacin   | 3.9662 | 14.6175           | 0                | 3.9006              | 0                           | 21.3927 | 1.000 | +     |
| Finafloxacin  | 4.3445 | 15.2083           | 0                | 3.4517              | 0                           | 27.0421 | 1.000 | +     |
| Garenoxacin   | 5.0117 | 15.3699           | 0                | 1.4562              | 0                           | 28.9818 | 1.000 | +     |
| Sparfloxacin  | 4.6719 | 15.6453           | 0                | 3.0307              | 0                           | 30.9007 | 1.000 | +     |
| Act3          | 5.1308 | 14.9072           | 3.8853           | 3.1561              | 0                           | 24.7741 | 0.935 | +     |
| Act4          | 5.1308 | 14.9396           | 3.9569           | 3.1511              | 0                           | 25.5773 | 1.000 | +     |
| Act5          | 5.6007 | 15.0058           | 4.075            | 3.17                | 0                           | 19.3139 | 1.000 | +     |
| Act7          | 4.6775 | 14.8281           | 3.8632           | 3.0849              | 0                           | 31.1697 | 1.000 | +     |
| Act8          | 5.1308 | 14.8943           | 3.9813           | 3.1038              | 0                           | 25.1767 | 1.000 | +     |
| Act32         | 5.6061 | 15.8019           | 4.0354           | 3.0286              | 1.1544                      | 2.6638  | 1.000 | +     |
| Gemifloxacin  | 4.8944 | 14.8745           | 3.9688           | 3.3757              | 0                           | 27.2736 | 1.000 | +     |
| Trovafoxacin  | 4.1573 | 14.835            | 0                | 2.731               | 0                           | 27.7648 | 1.000 | +     |
| Act2          | 5.3424 | 15.1956           | 3.8779           | 2.9715              | 0                           | 26.8901 | 1.000 | +     |
| Act14         | 6.0344 | 15.1822           | 4.0616           | 2.9802              | 0                           | 16.0129 | 1.000 | +     |
| Act15         | 6.3432 | 15.381            | 4.2133           | 2.9739              | 0                           | 14.7588 | 1.000 | +     |
| Act16         | 5.0862 | 14.8447           | 3.8649           | 2.9339              | 0                           | 25.5575 | 1.000 | +     |
| Act18         | 5.5543 | 14.9433           | 4.0472           | 2.9478              | 0                           | 20.1002 | 1.000 | +     |
| Act20         | 4.6348 | 14.7656           | 3.8354           | 2.8627              | 0                           | 31.8956 | 1.000 | +     |
| Act21         | 5.0862 | 14.8318           | 3.9535           | 2.8816              | 0                           | 25.9337 | 1.000 | +     |
| Act22         | 5.4263 | 15.0306           | 4.1052           | 2.8753              | 0                           | 24.1686 | 1.000 | +     |

**Table 4S.** Results obtained in the LDA and compound classification according to the DF. Inactive training group.

| Compound | PHIA   | SH <sub>tCH</sub> | S(=N-) | S(>N-) | C4C    | FD       | Prob. | Clas. |
|----------|--------|-------------------|--------|--------|--------|----------|-------|-------|
| Inact33  | 5.422  | 14.8998           | 0      | 6.2612 | 0      | -9.8488  | 1.000 | -     |
| Inact30  | 6.772  | 15.6554           | 4.1352 | 2.8651 | 1.1544 | -17.4963 | 1.000 | -     |
| Inact32  | 6.5855 | 15.565            | 4.2361 | 3.6054 | 1.1544 | -19.3399 | 1.000 | -     |
| Inact34  | 7.2905 | 15.3334           | 0      | 5.6188 | 0      | -30.0179 | 1.000 | -     |
| Inact3   | 7.8915 | 15.6887           | 0      | 5.0073 | 0      | -30.9581 | 1.000 | -     |
| Inact18  | 6.5842 | 15.207            | 0      | 5.7227 | 0      | -21.0793 | 1.000 | -     |
| Inact23  | 7.1667 | 15.0976           | 0      | 5.5345 | 0      | -31.3682 | 1.000 | -     |
| Inact31  | 7.2549 | 15.6693           | 4.1046 | 2.4621 | 1.1544 | -23.1873 | 1.000 | -     |

**Table 5S.** Results obtained in the LDA and compound classification according to the DF. Active test group.

| Compound      | PHIA   | SHtCH   | S(=N-) | S(>N-) | C4C | FD      | Prob. | Clas. |
|---------------|--------|---------|--------|--------|-----|---------|-------|-------|
| Ciprofloxacin | 3.8037 | 14.6077 | 0      | 3.7812 | 0   | 24.4927 | 1.000 | +     |
| Besifloxacin  | 4.8997 | 15.0234 | 0      | 3.5742 | 0   | 14.3929 | 1.000 | +     |
| Gatifloxacin  | 4.6898 | 15.1023 | 0      | 3.6897 | 0   | 18.4924 | 1.000 | +     |
| Ofloxacin     | 4.245  | 14.9837 | 0      | 5.8165 | 0   | 12.9508 | 0.998 | +     |
| Fleroxacin    | 5.237  | 15.1834 | 0      | 4.5829 | 0   | 6.3164  | 1.000 | +     |
| Act6          | 5.9211 | 15.2046 | 4.2268 | 3.1637 | 0   | 17.8711 | 1.000 | +     |
| Act9          | 5.4689 | 15.0931 | 4.133  | 3.0975 | 0   | 23.4452 | 1.000 | +     |
| Act1          | 5.8123 | 15.2747 | 3.8967 | 3.0427 | 0   | 20.2123 | 1.000 | +     |
| Act13         | 5.5562 | 15.116  | 3.9435 | 2.9613 | 0   | 22.4116 | 1.000 | +     |
| Act17         | 5.0862 | 14.8771 | 3.9292 | 2.9289 | 0   | 26.3346 | 1.000 | +     |
| Act19         | 5.8769 | 15.1421 | 4.199  | 2.9415 | 0   | 18.6215 | 1.000 | +     |

**Table 6S.** Results obtained in the LDA and compound classification according to the DF. Inactive test group.

| Compound | PHIA  | SHtCH   | S(=N-) | S(>N-) | C4C | FD       | Prob. | Clas. |
|----------|-------|---------|--------|--------|-----|----------|-------|-------|
| Inact6   | 6.448 | 15.1333 | 0      | 9.9826 | 0   | -41.8344 | 1.000 | -     |
