# Supplementary material
Source: MDPI journal article supplement (https://www.mdpi.com/1424-8247/13/12/431)
Supplement: s1 [file s1]

**Table 2.** Theoretically active compounds against *E. coli* selected by the model.

| DRUG                   | THERAPEUTIC USE           | ACTIVITY<br>AGAINST <i>E. coli</i> | REF. |
|------------------------|---------------------------|------------------------------------|------|
| Acyclovir              | Antiviral                 | Not described                      | 1    |
| Azacytidine            | Antineoplastic            | Not described                      | 1    |
| Azathioprine           | Anti-rheumatic            | Not described                      | 1    |
| Bicuculine             | GABA antagonist           | Not described                      | 1    |
| Cyclouridine           | Not described             | Not described                      | -    |
| Cinoxacin              | Antibiotic                | Active                             | 1    |
| Citarabine             | Antineoplastic            | Not described                      | 1    |
| Clobetasol propionate  | Glucocorticoid            | Not described                      | 1    |
| Clonazepam             | Anti-convulsive           | Not described                      | 1    |
| 2'Deoxyctidina         | Protein                   | Not described                      | 1    |
| D-biopterin            | Growth factor             | Not described                      | 1    |
| D-threo-Neopterin      | Growth factor             | Not described                      | 1    |
| Decitabine             | Antineoplastic            | Not described                      | 1    |
| Deflazacort            | Glucocorticoid            | Not described                      | 1    |
| Didanosine             | Antiviral                 | Not described                      | 1    |
| Diflorasone            | Glucocorticoid            | Not described                      | 1    |
| Difluprednate          | Anti-inflammatory         | Not described                      | 1    |
| Doxofylline            | Antitussive               | Not described                      | 1    |
| DNQX                   | Glutamate receptor        | Not described                      | 2    |
| Dyprophylline          | Bronchodilator            | Not described                      | 1    |
| Ellagic acid           | Antioxidant               | Not described                      | 1    |
| Emtricitabine          | Antiviral                 | Not described                      | 1    |
| Enoxacin               | Antibiotic                | Active                             | 1    |
| Entecavir              | Antiviral                 | Not described                      | 1    |
| 2-Fluoroadenosina      | Not described             | Not described                      | -    |
| 5-Fluorouridina        | Not described             | Not described                      | -    |
| Floxuridine            | Antineoplastic            | Not described                      | 1    |
| Flucloronide           | Glucocorticoid            | Not described                      | 1    |
| Fluconazole            | Antifungal                | Not described                      | 1    |
| Fludarabine            | Antineoplastic            | Not described                      | 1    |
| Fludroxycortide        | Glucocorticoid            | Not described                      | 1    |
| Flumazenil             | Benzodiazepine antagonist | Not described                      | 1    |
| Flumetasone            | Glucocorticoid            | Not described                      | 1    |
| Flunisolide            | Glucocorticoid            | Not described                      | 1    |
| Fluocinolone acetonide | Glucocorticoid            | Not described                      | 1    |
| Fluocinonide           | Glucocorticoid            | Not described                      | 1    |
| Fluticasone propionate | Glucocorticoid            | Not described                      | 1    |

|                          |                                 |               |   |
|--------------------------|---------------------------------|---------------|---|
| Furazolidone             | Anti-infective                  | Not described | 1 |
| Ganciclovir              | Antiviral                       | Not described | 1 |
| Ginkgolide C             | Neuroprotector                  | Not described | 3 |
| Guanosine                | Nucleoside                      | Not described | 1 |
| Halcinonide              | Anti-inflammatory               | Not described | 1 |
| Idelalisib               | Antineoplastic                  | Not described | 1 |
| Isatoribine              | Antiviral                       | Not described | 1 |
| Kifunensine              | Mannosidase inhibitor           | Not described | 4 |
| Lamivudine               | Antiviral                       | Not described | 1 |
| Levosimendan             | Cardiotonic                     | Not described | 1 |
| Lidorestat               | Diabetic neuropathy             | Not described | 1 |
| Loflazepate ethyl        | Anxiolytic                      | Not described | 5 |
| Lomefloxacin             | Antibiotic                      | Active        | 1 |
| Myricetina               | Antioxidant                     | Not described | 1 |
| Nafamostat               | Anti-inflammatory               | Not described | 1 |
| Nitrofurantoin           | Antibiotic                      | Active        | 1 |
| Ofloxacin                | Antibiotic                      | Active        | 1 |
| Olaparib                 | Antineoplastic                  | Not described | 1 |
| Oteracil                 | Antineoplastic                  | Not described | 1 |
| Pefloxacin               | Antibiotic                      | Active        | 1 |
| Penciclovir              | Antiviral                       | Not described | 1 |
| Pidotimod                | Immunomodulator                 | Not described | 1 |
| Pyrroloquinoline quinone | Coenzyme                        | Not described | 6 |
| Pomalidomide             | Immunomodulator                 | Not described | 1 |
| Quercetin                | Antioxidant                     | Not described | 1 |
| Ribavirin                | Antiviral                       | Not described | 1 |
| Riboflavin               | Vitamin                         | Not described | 1 |
| Riociguat                | Pulmonary arterial hypertension | Not described | 1 |
| Sapropterin              | Phenylketonuria                 | Not described | 7 |
| Sarafloxacin             | Antibiotic                      | Active        | 1 |
| SB220025                 | Antineoplastic                  | Not described | 8 |
| Taxifolin                | Anti-inflammatory               | Not described | 1 |
| Tazobactam               | Antibiotic                      | Active        | 1 |
| Triamcinolone            | Glucocorticoid                  | Not described | 1 |
| Troxacitabine            | Antineoplastic                  | Not described | 1 |
| Ulobetasol               | Glucocorticoid                  | Not described | 1 |
| Uric acid                | Not described                   | Not described | - |
| Zardaverine              | Bronchodilator                  | Not described | 1 |
| Zebularine               | Antineoplastic                  | Not described | 1 |
| Zenarestat               | Diabetic neuropathy             | Not described | 9 |

|                                                                                                                                                             |                    |               |    |
|-------------------------------------------------------------------------------------------------------------------------------------------------------------|--------------------|---------------|----|
| Zidovudine                                                                                                                                                  | Antiviral          | Not described | 1  |
| ZM-241,385                                                                                                                                                  | Alzheimer          | Not described | 10 |
| 62T278S1MX                                                                                                                                                  | Glutamate receptor | Not described | 11 |
| 8258W48TBZ                                                                                                                                                  | Antineoplastic     | Not described | 12 |
| 9-a-L-Arabinofuranosylguanine                                                                                                                               | Not described      | Not described | -  |
| 1-a-Arabinofuranosylcytosine                                                                                                                                | Not described      | Not described | -  |
| (2E)-N-(3-Nitrophenyl)-4-[3-(1H-1,2,4-triazol-1-ylmethyl)phenyl]-2(5H)-pyrimidinimine                                                                       | Not described      | Not described | -  |
| 3-[5-(1H-Imidazol-1-yl)-7-methyl-1H-benzimidazol-2-yl]-4-[(2-pyridinylmethyl)amino]-2(1H)-pyridinone                                                        | Diabetes           | Not described | 13 |
| 3-[(3-Fluoro-3'-methoxy-4-biphenyl)carbonyl]-2-thiophenecarboxylic acid                                                                                     | Not described      | Not described | -  |
| 2-(1,3-Benzodioxol-5-yl)-5-[(3-fluoro-4-methoxybenzyl)sulfanyl]-1,3,4-oxadiazole                                                                            | Not described      | Not described | -  |
| 7-nitroindazole-2-carboximidamide                                                                                                                           | Neuroprotector     | Not described | 14 |
| (7R)-6-Formyl-7-(1-methyl-1H-1,2,3-triazol-4-yl)-4,7-dihydro-1,4-thiazepine-3-carboxylic acid                                                               | Not described      | Not described | -  |
| 6-(3,4-Dihydroxybenzyl)-3-éthyl-1-(2,4,6-trichlorophényl)-1,5-dihydro-4H-pyrazolo[3,4-d]pyrimidin-4-one                                                     | Not described      | Not described | -  |
| 3'-oxo-adenosine                                                                                                                                            | Not described      | Not described | -  |
| (6S)-5,6,7,8-tetrahydrobiopterin                                                                                                                            | Neuroprotector     | Not described | 15 |
| 2-Amino-7-methyl-6-oxo-9-pentofuranosyl-6,7-dihydro-1H-purin-9-ium                                                                                          | Not described      | Not described | -  |
| Quinonoid 7,8-tetrahydrobiopterin                                                                                                                           | Not described      | Not described | -  |
| 8-hydroxy-2'-deoxyguanosine                                                                                                                                 | Not described      | Not described | -  |
| 5-(Hydroxymethyl)-5,6,7,8-tetrahydrotetrazolo[1,5-a]pyridine-6,7,8-triol                                                                                    | Not described      | Not described | -  |
| (2Z,5Z)-5-[(5-Ethyl-2-furyl)methylene]-2-[(4-fluorophenyl)(1H-tetrazol-5-yl)methyl]imino)-1,3-thiazolidin-4-one                                             | Not described      | Not described | -  |
| (20s)-19,20,21,22-tetrahydro-19-oxo-5h-18,20-ethano-12,14-etheno-6,10-metheno-18h-benz[d]imidazo[4,3-k][1,6,9,12]oxatriaza-cyclooctadecosine-9-carbonitrile | Not described      | Not described | -  |
| 4-[(2,6-Difluorobenzoyl)amino]-N-(4-fluorophenyl)-1H-pyrazole-3-carboxamide                                                                                 | Not described      | Not described | -  |

|                                                                                                                             |               |               |   |
|-----------------------------------------------------------------------------------------------------------------------------|---------------|---------------|---|
| N-{3-[(4-Anilino-8-cyanopyrazolo[1,5-a][1,3,5]triazin-2-yl)amino]phenyl}acetamide                                           | Not described | Not described | - |
| (3Z)-1-[(6-Fluoro-4H-1,3-benzodioxin-8-yl)methyl]-3-(hydroxyimino)-4-phenyl-1,3-dihydro-2H-indol-2-one                      | Not described | Not described | - |
| N-Cyclopropyl-3-[[1-(2,4-difluorophenyl)-7-methyl-6-oxo-6,7-dihydro-1H-pyrazolo[3,4-b]pyridin-4-yl]amino]-4-methylbenzamide | Not described | Not described | - |
| 3-[6-Bromo-2-fluoro-3-(1H-pyrazolo[3,4-c]pyridazin-3-ylmethyl)phenoxy]-5-chlorobenzonitrile                                 | Not described | Not described | - |
| (5S,6Z)-4,5-Difluoro-6-[(2-fluoro-4-iodophenyl)imino]-N-(2-hydroxyethoxy)-1,3-cyclohexadiene-1-carboxamide                  | Not described | Not described | - |
| N-{2-[(2R)-4-Amino-5,8-difluoro-1,2-dihydro-2-quinazolinyl]ethyl}-3-furamide                                                | Not described | Not described | - |
| 4-[(1S)-1-(3-Fluoro-4-methoxyphenyl)-2-(2-methoxy-5-nitrophenyl)ethyl]-1H-imidazol-2-amine                                  | Not described | Not described | - |
| 2,4-Dinitrophenyl 2-deoxy-2-fluoro-β-D-mannopyranoside                                                                      | Not described | Not described | - |
| (5E,7S)-7-[4-Fluoro-2-(3-pyridinyl)phenyl]-5-(hydroxyimino)-4-methyl-5,6,7,8-tetrahydro-2-quinazolinamine                   | Not described | Not described | - |
| (3E)-5-Fluoro-1-[(6-fluoro-4H-1,3-benzodioxin-8-yl)methyl]-3-(hydroxyimino)-1,3-dihydro-2H-indol-2-one                      | Not described | Not described | - |
| 1-(5-Bromo-2-pyridinyl)-3-[(1S,2S)-2-(6-fluoro-2-hydroxy-3-propionylphenyl)cyclopropyl]urea                                 | Not described | Not described | - |
| (5R)-5-[[2-Amino-3H-purin-6-yl]oxy]methyl]-2-pyrrolidinone                                                                  | Not described | Not described | - |
| 2,6-Diamino-8-[(1H-imidazol-2-ylsulfanyl)methyl]-4(1H)-quinazolinone                                                        | Not described | Not described | - |
| (7R)-7-(6,7-Dihydro-5H-cyclopenta[d]imidazo[2,1-b][1,3]thiazol-2-yl)-2,7-dihydro-1,4-thiazepine-3,6-dicarboxylic acid       | Not described | Not described | - |
| 2-Anilino-9-(4-hydroxybutyl)-1,9-dihydro-6H-purin-6-one                                                                     | Not described | Not described | - |

|                                                                                                                                       |               |               |   |
|---------------------------------------------------------------------------------------------------------------------------------------|---------------|---------------|---|
| 3-(5-Amino-7-oxo-3,7-dihydro-2H-[1,2,3]triazolo[4,5-d]pyrimidin-2-yl)benzoic acid                                                     | Not described | Not described | - |
| 9-Butyl-8-(2,5-dimethoxybenzyl)-2-fluoro-9H-purin-6-amine                                                                             | Not described | Not described | - |
| (2R,4S)-6-Fluoro-2',5'-dioxo-2,3-dihydrospiro[chromene-4,4'-imidazolidine]-2-carboxamide                                              | Not described | Not described | - |
| 1-(2-Deoxy- $\alpha$ -L-erythro-pentofuranosyl)cytosine                                                                               | Not described | Not described | - |
| (1R,3S)-7,8-Dihydroxy-1-methoxy-3-methyl-10-oxo-4,10-dihydro-1H,3H-pyrano[4,3-b]chromene-9-carboxylic acid                            | Not described | Not described | - |
| (2-Amino-3-benzoylimidazo[1,2-a]pyridin-6-yl)(2,6-difluorophenyl)methanone                                                            | Not described | Not described | - |
| 8-(2,5-Dimethoxybenzyl)-2-fluoro-9-(4-pentyn-1-yl)-9H-purin-6-amine                                                                   | Not described | Not described | - |
| 1-[(Z)-[(5-Nitro-2-furyl)methylene]amino]-2,4-imidazolidinedione                                                                      | Not described | Not described | - |
| (6S)-2,6-Anhydro-3-deoxy-3-fluoro-6-[(1R,2R)-1,2,3-trihydroxypropyl]-L-galactonic acid                                                | Not described | Not described | - |
| 7(S),8(R)-Dihydrobiopterin                                                                                                            | Not described | Not described | - |
| 3-(2H-Tetrazol-5-ylmethyl)-5,6,7,8-tetrahydro[1]benzothieno[2,3-d]pyrimidin-4(3H)-one                                                 | Not described | Not described | - |
| N-ethyl-5'-carboxamido adenosine                                                                                                      | Not described | Not described | - |
| 2-((9H-Purin-6-ylthio)methyl)-5-chloro-3-(2-methoxyphenyl)quinazolin-4(3H)-one                                                        | Not described | Not described | - |
| 7-[(1R,5S)-6-Amino-3-azabicyclo[3.1.0]hex-3-yl]-1-(2,4-difluorophenyl)-6-fluoro-4-oxo-1,4-dihydro-1,8-naphthyridine-3-carboxylic acid | Not described | Not described | - |
| 2,3,5,6-Tetrafluoro-4-methoxybenzamida                                                                                                | Not described | Not described | - |
| 4-[[4-(4-Fluoro-3-methylphenyl)-1,3-thiazol-2-yl]amino]-2-hydroxybenzoic acid                                                         | Not described | Not described | - |
| (2S)-N-[(3Z)-5-Cyclopropyl-3H-pyrazol-3-ylidene]-2-[4-(2-oxo-1-imidazolidinyl)phenyl]propanamide                                      | Not described | Not described | - |
| 2-Amino-N-(4-methyl-1,3-thiazol-2-yl)-5-[(4-methyl-4H-1,2,4-triazol-3-yl)sulfanyl]benzamide                                           | Not described | Not described | - |

|                                                                                                |               |               |   |
|------------------------------------------------------------------------------------------------|---------------|---------------|---|
| {3-[(4,5,7-Trifluoro-1,3-benzothiazol-2-yl)methyl]-1H-pyrrolo[2,3-b]pyridin-1-yl}acetic acid   | Not described | Not described | - |
| 2-(4-Fluorophenyl)-N-[[3-fluoro-4-(1H-pyrrolo[2,3-b]pyridin-4-yloxy)phenyl]carbamoyl]acetamide | Not described | Not described | - |

## References

1. DrugBank. Available online: <https://www.drugbank.ca>
2. Paul, K.N.; Fukuhara, C.; Karom, M.; Tosini, G.; Albers, H.E. AMPA/kainite receptor antagonist DNQX blocks the acute increase of Per2 mRNA levels in most but not all areas of the SCN. *Brain Res Mol Brain Res* **2005**, *139*, 129-136. doi: 10.1016/j.molbrainres.2005.05.017
3. Liou, C.J.; Lai, X.Y.; Chen, Y.L.; Wang, C.L.; Wei, C.H.; Huang, W.C. Ginkgolide C Suppresses Adipogenesis in 3T3-L1 Adipocytes via the AMPK Signaling Pathway. *Evid Based Complement Alternat Med* **2015**, epub: 2015:298635. doi: 10.1155/2017/4293429
4. Vallee, F.; Karaveg, K.; Herscovics, A.; Moremen, K.W.; Howell, P.L. Structural basis for catalysis and inhibition of N-glycan processing class I alpha 1,2-mannosidases. *J Biol Chem* **2000**, *275*, 41287-41298. doi: 10.1074/jbc.M006927200
5. Sakai, Y.; Namima, M. Inhibitory effect on 3H-diazepam binding and potentiating action on GABA of ethyl loflazepate, a new minor tranquilizer. *Jpn J Pharmacol* **1985**, *37*, 373-379.
6. Sawyer, J.S.; Beight, D.W.; Britt, K.S. et al. Synthesis and activity of new aryl- and heteroaryl-substituted 5,6-dihydro-4H-pyrrolo[1,2-b]pyrazole inhibitors of the transforming growth factor-beta type 1 receptor kinase domain. *Bioorg Med Chem Lett* **2004**, *14*, 3581-3584. doi: 10.1016/j.bmcl.2004.04.007
7. Camp, K.M.; Parisi, M.A.; Acosta, P.B.; et al. Phenylketonuria Scientific Review Conference: State of the science and future research needs. *Mol Gen Metabol* **2014**, *112*, 87-111. doi: 10.1016/j.ymgme.2014.02.013
8. Wang, Z.; Canagarajah, B.J.; Boehm, J.C.; et al. Structural basis of inhibitor selectivity in MAP kinases. *Structure* **1998**, *6*, 1117-1128.
9. Kinoshita, T.; Miyake, H.; Fuji, T.; Takakura, S.; Goto, T. The structure of human recombinant aldose reductase complexed with the potent inhibitor zenarestat. *Acta Crystallogr* **2002**, *58*, 61-626. doi: 10.1107/s0907444902002378
10. Jaakola, V.P.; Griffith, M.T.; Hanson, M.A.; et al. The 2.6 Angstrom Crystal Structure of a Human A2A Adenosine Receptor Bound to an Antagonist. *Science* **2008**, *31*, 1211-1217. doi: 10.1126/science.1164772
11. Marinho da Silva, S.; Carrettiero, D.C.; Chadi, D.R. Glutamate requires NMDA receptors to modulate alpha2 adrenoceptor in medulla oblongata cultured cells of newborn rats. *Neurosci Lett* **2014**, *564*, 83-88. doi: 10.1016/j.neulet.2014.02.003
12. Yan, X.; Hollis, T.; Svinth, M.; Day, P.; et al. Structure-based identification of a ricin inhibitor. *J Mol Biol* **1997**, *266*, 1043-1049. doi: 10.1006/jmbi.1996.0865
13. Kontopidis, G.; McInnes, C.; Pandalaneni, S.R.; et al. Differential Binding of Inhibitors to Active and Inactive Cdk2 Provides Insights for Drug Design. *Chem Biol* **2006**, *13*, 201. doi: 10.1016/j.chembiol.2005.11.011
14. Raman, C.S.; Li, H.; Martasek, P.; Southan, G.; Masters, B.S.; Poulos, T.L. Crystal structure of nitric oxide synthase bound to nitro indazole reveals a novel inactivation mechanism. *Biochemistry* **2001**, *40*, 13448-13455. doi: 10.1021/bi010957u
15. Raman, C.S.; Li, H.; Martasek, P.; et al. Crystal Structures of Bovine Endothelial Nitric Oxide Synthase Heme Domain Complexed with the Pterin Analogues. RCSB PDB.
