# Supplementary material
Source: MDPI journal article supplement (https://www.mdpi.com/1424-8247/13/12/431)
Supplement: s1 [file s1]

**Table 1S. Active compounds against *E. coli***

| Compound | IUPAC Name                                                                                                                                             | Structure | Reference                                                                                                                                                                                                                                        |
|----------|--------------------------------------------------------------------------------------------------------------------------------------------------------|-----------|--------------------------------------------------------------------------------------------------------------------------------------------------------------------------------------------------------------------------------------------------|
| Act1     | ( <i>E</i> )-7-(3-amino-4-(methoxyimino)pyridin-1-yl)-6-fluoro-1-(2-fluorocyclopropyl)-8-methoxy-4-oxo-1,4-dihydroquinoline-3-carboxylic acid          |           | Liu H, Huang J, Wang J et al. Synthesis, antimycobacterial and antibacterial evaluation of 1-[(1 <i>R</i> , 2 <i>S</i> )-2-fluorocyclopropyl]fluoroquinolone derivatives containing an oxime functional moiety. Eur J Med Chem 2014; 86:628-638. |
| Act2     | ( <i>E</i> )-7-(2-(aminomethyl)-3-(methoxyimino)azetidin-1-yl)-6-fluoro-1-(2-fluorocyclopropyl)-8-methoxy-4-oxo-1,4-dihydroquinoline-3-carboxylic acid |           | Idem                                                                                                                                                                                                                                             |
| Act3     | ( <i>E</i> )-7-(3-amino-4-(methoxyimino)pyridin-1-yl)-6-fluoro-1-(2-fluorocyclopropyl)-4-oxo-1,4-dihydroquinoline-3-carboxylic acid                    |           | Idem                                                                                                                                                                                                                                             |
| Act4     | ( <i>Z</i> )-7-(3-(aminomethyl)-4-(methoxyimino)pyrrolidin-1-yl)-6-fluoro-1-(2-fluorocyclopropyl)-4-oxo-1,4-dihydroquinoline-3-carboxylic acid         |           | Idem                                                                                                                                                                                                                                             |
| Act5     | ( <i>Z</i> )-7-(3-(aminomethyl)-4-(ethoxyimino)pyrrolidin-1-yl)-6-fluoro-1-(2-fluorocyclopropyl)-4-oxo-1,4-dihydroquinoline-3-carboxylic acid          |           | Idem                                                                                                                                                                                                                                             |
| Act6     | ( <i>Z</i> )-7-(3-(aminomethyl)-4-(phenoxyimino)pyrrolidin-1-yl)-6-fluoro-1-(2-fluorocyclopropyl)-4-oxo-1,4-dihydroquinoline-3-carboxylic acid         |           | Idem                                                                                                                                                                                                                                             |

|       |                                                                                                                                                |  |      |
|-------|------------------------------------------------------------------------------------------------------------------------------------------------|--|------|
|       | -4-oxo-1,4-dihydroquinoline-3-carboxylic acid                                                                                                  |  |      |
| Act7  | (E)-7-(2-(aminomethyl)-3-(methoxyimino)azetidin-1-yl)-6-fluoro-1-(2-fluorocyclopropyl)-4-oxo-1,4-dihydroquinoline-3-carboxylic acid            |  | Idem |
| Act8  | (E)-7-(2-(aminomethyl)-3-(ethoxyimino)azetidin-1-yl)-6-fluoro-1-(2-fluorocyclopropyl)-4-oxo-1,4-dihydroquinoline-3-carboxylic acid             |  | Idem |
| Act9  | (E)-7-(2-(aminomethyl)-3-(phenoxyimino)azetidin-1-yl)-6-fluoro-1-(2-fluorocyclopropyl)-4-oxo-1,4-dihydroquinoline-3-carboxylic acid            |  | Idem |
| Act13 | (Z)-7-(3-(aminomethyl)-4-(methoxyimino)pyrrolidin-1-yl)-8-chloro-6-fluoro-1-(2-fluorocyclopropyl)-4-oxo-1,4-dihydroquinoline-3-carboxylic acid |  | Idem |
| Act14 | (Z)-7-(3-(aminomethyl)-4-(ethoxyimino)pyrrolidin-1-yl)-8-chloro-6-fluoro-1-(2-fluorocyclopropyl)-4-oxo-1,4-dihydroquinoline-3-carboxylic acid  |  | Idem |
| Act15 | (Z)-7-(3-(aminomethyl)-4-(phenoxyimino)pyrrolidin-1-yl)-8-chloro-6-fluoro-1-(2-fluorocyclopropyl)-4-oxo-1,4-dihydroquinoline-3-carboxylic acid |  | Idem |

|       |                                                                                                                                                         |                                                                                      |      |
|-------|---------------------------------------------------------------------------------------------------------------------------------------------------------|--------------------------------------------------------------------------------------|------|
|       | -4-oxo-1,4-dihydroquinoline-3-carboxylic acid                                                                                                           |                                                                                      |      |
| Act16 | ( <i>E</i> )-7-(3-amino-4-(methoxyimino)pyridin-1-yl)-6-fluoro-1-(2-fluorocyclopropyl)-4-oxo-1,4-dihydro-1,8-naphthyridine-3-carboxylic acid            | 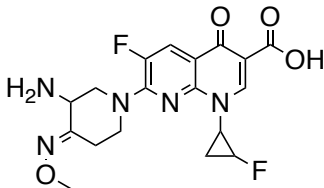   | Idem |
| Act17 | ( <i>Z</i> )-7-(3-(aminomethyl)-4-(methoxyimino)pyrrolidin-1-yl)-6-fluoro-1-(2-fluorocyclopropyl)-4-oxo-1,4-dihydro-1,8-naphthyridine-3-carboxylic acid |    | Idem |
| Act18 | ( <i>Z</i> )-7-(3-(aminomethyl)-4-(ethoxyimino)pyrrolidin-1-yl)-6-fluoro-1-(2-fluorocyclopropyl)-4-oxo-1,4-dihydro-1,8-naphthyridine-3-carboxylic acid  |   | Idem |
| Act19 | ( <i>Z</i> )-7-(3-(aminomethyl)-4-(phenoxyimino)pyrrolidin-1-yl)-6-fluoro-1-(2-fluorocyclopropyl)-4-oxo-1,4-dihydro-1,8-naphthyridine-3-carboxylic acid |  | Idem |
| Act20 | ( <i>E</i> )-7-(2-(aminomethyl)-3-(methoxyimino)azetidin-1-yl)-6-fluoro-1-(2-fluorocyclopropyl)-4-oxo-1,4-dihydro-1,8-naphthyridine-3-carboxylic acid   |  | Idem |
| Act21 | ( <i>E</i> )-7-(2-(aminomethyl)-3-(ethoxyimino)azetidin-1-yl)-6-fluoro-1-(2-                                                                            |  | Idem |

|              |                                                                                                                                                                 |                                                                                      |                                                                                                                                                                                                   |
|--------------|-----------------------------------------------------------------------------------------------------------------------------------------------------------------|--------------------------------------------------------------------------------------|---------------------------------------------------------------------------------------------------------------------------------------------------------------------------------------------------|
|              | fluorocyclopropyl)-4-oxo-1,4-dihydro-1,8-naphthyridine-3-carboxylic acid                                                                                        |                                                                                      |                                                                                                                                                                                                   |
| Act22        | ( <i>E</i> )-7-(2-(aminomethyl)-3-(phenoxyimino)azetidin-1-yl)-6-fluoro-1-(2-fluorocyclopropyl)-4-oxo-1,4-dihydro-1,8-naphthyridine-3-carboxylic acid           | 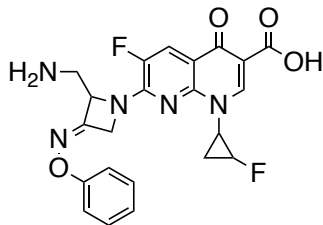   | Idem                                                                                                                                                                                              |
| Act26        | 6,8-difluoro-1-(4-fluorophenyl)-7-(4-(2-((4-(2-fluorophenyl)-5-oxo-2,5-dihydrofuran-3-yl)oxy)ethyl)piperazin-1-yl)-4-oxo-1,4-dihydroquinoline-3-carboxylic acid |    | Wang XD, Wei W, Wang PF et al. Novel 3-arylfuran-2(5H)-one-fluoroquinolone hybrid: design, synthesis and evaluation as antibacterial agent. Bioorg Med Chem 2014, 22(14):3620-3628.               |
| Act27        | 1-cyclopropyl-6,8-difluoro-7-(4-(2-((4-(2-fluorophenyl)-5-oxo-2,5-dihydrofuran-3-yl)oxy)ethyl)piperazin-1-yl)-4-oxo-1,4-dihydroquinoline-3-carboxylic acid      |  | Wang XD, Wei W, Wang PF et al. Novel 3-arylfuran-2(5H)-one-fluoroquinolone hybrid: design, synthesis and evaluation as antibacterial agent. Bioorg Med Chem 2014, 22(14):3620-3628.               |
| Act32        | ( <i>Z</i> )-7-(3-(aminomethyl)-4-(methoxyimino)-3-methylpiperidin-1-yl)-1-cyclopropyl-6,8-difluoro-4-oxo-1,4-dihydroquinoline-3-carboxylic acid                |  | Chai Y, Liu M, Wang B, et al. Synthesis and in vitro antibacterial activity of novel fluoroquinolone derivatives containing substituted piperidines. Bioorg Med Chem Lett 2010; 20(17):5195-5198. |
| Besifloxacin | 7-(3-aminoazepan-1-yl)-8-chloro-1-cyclopropyl-6-fluoro-4-oxo-1,4-dihydroquinoline-3-carboxylic acid                                                             |  | CLSI Performance Standards for Antimicrobial Susceptibility Testing, 26th Edition.                                                                                                                |

|               |                                                                                                                                |                                                                                      |      |
|---------------|--------------------------------------------------------------------------------------------------------------------------------|--------------------------------------------------------------------------------------|------|
| Ciprofloxacin | 1-cyclopropyl-6-fluoro-4-oxo-7-(piperazin-1-yl)-1,4-dihydroquinoline-3-carboxylic acid                                         | 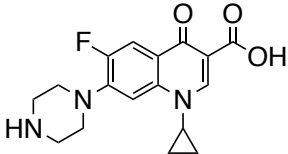   | Idem |
| Clinafloxacin | 7-(3-aminopyrrolidin-1-yl)-8-chloro-1-cyclopropyl-6-fluoro-4-oxo-1,4-dihydroquinoline-3-carboxylic acid                        |    | Idem |
| Delafloxacin  | 1-(6-amino-3,5-difluoropyridin-2-yl)-8-chloro-6-fluoro-7-(3-hydroxyazetidin-1-yl)-4-oxo-1,4-dihydroquinoline-3-carboxylic acid |    | Idem |
| Enoxacin      | 1-ethyl-6-fluoro-4-oxo-7-(piperazin-1-yl)-1,4-dihydro-1,8-naphthyridine-3-carboxylic acid                                      |   | Idem |
| Finafloxacin  | 8-cyano-1-cyclopropyl-6-fluoro-7-(hexahydropyrrolo[3,4-b][1,4]oxazin-6(2H)-yl)-4-oxo-1,4-dihydroquinoline-3-carboxylic acid    |  | Idem |
| Fleroxacin    | 6,8-difluoro-1-(2-fluoroethyl)-7-(4-methylpiperazin-1-yl)-4-oxo-1,4-dihydroquinoline-3-carboxylic acid                         |  | Idem |
| Garenoxacin   | 1-cyclopropyl-8-(difluoromethoxy)-6-fluoro-7-(1-methylisoindolin-5-yl)-4-oxo-1,4-dihydroquinoline-3-carboxylic acid            |  | Idem |
| Gatifloxacin  | 1-cyclopropyl-6-fluoro-8-methoxy-7-(3-methylpiperazin-1-yl)-4-oxo-1,4-dihydroquinoline-3-carboxylic acid                       |  | Idem |

|               |                                                                                                                                      |                                                                                      |                                                                                                                                            |
|---------------|--------------------------------------------------------------------------------------------------------------------------------------|--------------------------------------------------------------------------------------|--------------------------------------------------------------------------------------------------------------------------------------------|
| Gemifloxacin  | (Z)-7-(3-(aminomethyl)-4-(methoxyimino)pyrrolidin-1-yl)-1-cyclopropyl-6-fluoro-4-oxo-1,4-dihydro-1,8-naphthyridine-3-carboxylic acid | 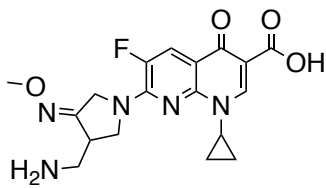   | Idem                                                                                                                                       |
| Grepafloxacin | 1-cyclopropyl-6-fluoro-5-methyl-7-(3-methylpiperazin-1-yl)-4-oxo-1,4-dihydroquinoline-3-carboxylic acid                              |    | Idem                                                                                                                                       |
| Levofloxacin  | 9-fluoro-3-methyl-10-(4-methylpiperazin-1-yl)-7-oxo-2,3-dihydro-7H-[1,4]oxazino[2,3,4-ij]quinoline-6-carboxylic acid                 |    | Idem                                                                                                                                       |
| Lomefloxacin  | 1-ethyl-6,8-difluoro-7-(3-methylpiperazin-1-yl)-4-oxo-1,4-dihydroquinoline-3-carboxylic acid                                         |   | Idem                                                                                                                                       |
| Moxifloxacin  | 1-cyclopropyl-6-fluoro-8-methoxy-7-(octahydro-6H-pyrrolo[3,4-b]pyridin-6-yl)-4-oxo-1,4-dihydroquinoline-3-carboxylic acid            |  | Idem                                                                                                                                       |
| Norfloxacin   | 1-ethyl-6-fluoro-4-oxo-7-(piperazin-1-yl)-1,4-dihydroquinoline-3-carboxylic acid                                                     |  | Idem                                                                                                                                       |
| Ofloxacin     | 9-fluoro-3-methyl-10-(4-methylpiperazin-1-yl)-7-oxo-2,3-dihydro-7H-[1,4]oxazino[2,3,4-ij]quinoline-6-carboxylic acid                 |  | Idem                                                                                                                                       |
| Pradofloxacin | 8-cyano-1-cyclopropyl-6-fluoro-7-(octahydro-6H-pyrrolo[3,4-b]pyridin-6-yl)-4-                                                        |  | Pridmore A, Stephan B, Griefe HA. In vitro activity of pradofloxacin against clinical isolates from European field studies In: Proceedings |

|               |                                                                                                                                          |                                                                                      |                                                                                                                                                                                                                                                                                                                                          |
|---------------|------------------------------------------------------------------------------------------------------------------------------------------|--------------------------------------------------------------------------------------|------------------------------------------------------------------------------------------------------------------------------------------------------------------------------------------------------------------------------------------------------------------------------------------------------------------------------------------|
|               | oxo-1,4-dihydroquinoline-3-carboxylic acid                                                                                               |                                                                                      | <p>of the American Society for Microbiology (ASM) 105th General Meeting, Atlanta, GA, USA p617, 2005.</p> <p>Abraham J, Ewet K, de Jong A. Pradofloxacin: Comparative in vitro activity against selected pathogens from the US. In: 42nd Interscience Conference on Antimicrobial Agents and Chemotherapy, San Diego, CA, USA p.189.</p> |
| Sparfloxacin  | 5-amino-1-cyclopropyl-7-(3,5-dimethylpiperazin-1-yl)-6,8-difluoro-4-oxo-1,4-dihydroquinoline-3-carboxylic acid                           | 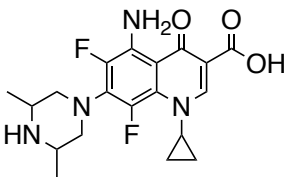   | Idem                                                                                                                                                                                                                                                                                                                                     |
| Trovafloxacin | 7-(6-amino-3-azabicyclo[3.1.0]hexan-3-yl)-1-(2,4-difluorophenyl)-6-fluoro-4-oxo-1,4-dihydro-1,8-naphthyridine-3-carboxylic acid          |  | Idem                                                                                                                                                                                                                                                                                                                                     |
| Ulifloxacin   | 6-fluoro-1-methyl-4-oxo-7-(piperazin-1-yl)-2a,3-dihydro-1 <i>H</i> ,4 <i>H</i> -[1,3]thiazeto[3,2- <i>a</i> ]quinoline-3-carboxylic acid |  | Idem                                                                                                                                                                                                                                                                                                                                     |
| PGE-8367769   | 1-cyclopropyl-6-fluoro-7,8-dimethyl-4-oxo-1,4-dihydroquinoline-3-carboxylic acid                                                         |   | <p>Macinga DR, Renick PJ, Makin KM, et al. Unique biological properties and molecular mechanism of 5,6-bridged quinolones. Antimicrob Agents Chemother. 2003; 47(8):2526-2537.</p>                                                                                                                                                       |

**Table 2S. Inactive compounds against *E. coli***

| Compound | IUPAC Name                                                                                                                                                                       | Structure | Reference                                                                                                                                                                                                                                                          |
|----------|----------------------------------------------------------------------------------------------------------------------------------------------------------------------------------|-----------|--------------------------------------------------------------------------------------------------------------------------------------------------------------------------------------------------------------------------------------------------------------------|
| Inact1   | 1-ethyl-6,8-difluoro-4-oxo-7-(4-(((3,4,5-triacetoxy-6-(acetoxymethyl)tetrahydro-2H-pyran-2-yl)oxy)methyl)-1H-1,2,3-triazol-1-yl)-1,4-dihydroquinoline-3-carboxylic acid          |           | Azad CS, Bhunia SS, Krishna A, Shukla PK, Saxena AK. Novel Glycoconjugate of 8-Fluoro Norfloxacin Derivatives as Gentamicin-resistant <i>Staphylococcus aureus</i> Inhibitors: Synthesis and Molecular Modelling Studies. Chem Biol Drug Des. 2015; 86(4):440-446. |
| Inact2   | 7-(4-(((3-acetamido-4,5-diacetoxy-6-(acetoxymethyl)tetrahydro-2H-pyran-2-yl)oxy)methyl)-1H-1,2,3-triazol-1-yl)-1-ethyl-6,8-difluoro-4-oxo-1,4-dihydroquinoline-3-carboxylic acid |           | Idem                                                                                                                                                                                                                                                               |
| Inact3   | 1-ethyl-6,8-difluoro-4-oxo-7-(4-(2-((5-oxo-4-phenyl-2,5-dihydrofuran-3-yl)oxy)ethyl)piperazin-1-yl)-1,4-dihydroquinoline-3-carboxylic acid                                       |           | Wang XD, Wei W, Wang PF et al. Novel 3-arylfuran-2(5H)-one-fluoroquinolone hybrid: design, synthesis and evaluation as antibacterial agent. Bioorg Med Chem. 2014, 22(14):3620-3628.                                                                               |
| Inact4   | 7-(4-(2-((4-(4-chlorophenyl)-5-oxo-2,5-dihydrofuran-3-yl)oxy)ethyl)piperazin-1-yl)-1-ethyl-6,8-difluoro-4-oxo-1,4-dihydroquinoline-3-carboxylic acid                             |           | Idem                                                                                                                                                                                                                                                               |



|        |                                                                                                                                                             |  |                                                                                                                                                                                                                                                                                         |
|--------|-------------------------------------------------------------------------------------------------------------------------------------------------------------|--|-----------------------------------------------------------------------------------------------------------------------------------------------------------------------------------------------------------------------------------------------------------------------------------------|
| Inact5 | 1-cyclopropyl-6,8-difluoro-7-(4-(2-((4-(4-methoxyphenyl)-5-oxo-2,5-dihydrofuran-3-yl)oxy)ethyl)piperazin-1-yl)-4-oxo-1,4-dihydroquinoline-3-carboxylic acid |  | Idem                                                                                                                                                                                                                                                                                    |
| Inact6 | 1-cyclopropyl-6-fluoro-7-(4-(2-(4-methylpiperazin-1-yl)acetyl)piperazin-1-yl)-4-oxo-1,4-dihydroquinoline-3-carboxylic acid                                  |  | Suresh N, Nagesh HN, Renuka J, et al. Synthesis and evaluation of 1-cyclopropyl-6-fluoro-1,4-dihydro-4-oxo-7-(4-(2-(4-substitutedpiperazin-1-yl)acetyl)piperazin-1-yl)quinoline-3-carboxylic acid derivatives as anti-tubercular and antibacterial agents. Eur J Med. 2014; 71:324-332. |
| Inact7 | 1-cyclopropyl-7-(4-(2-(4-(3,4-difluorophenyl)piperazin-1-yl)acetyl)piperazin-1-yl)-6-fluoro-4-oxo-1,4-dihydroquinoline-3-carboxylic acid                    |  | Idem                                                                                                                                                                                                                                                                                    |
| Inact8 | 7-(4-(2-(4-(bis(4-fluorophenyl)methyl)piperazin-1-yl)acetyl)piperazin-1-yl)-1-cyclopropyl-6-fluoro-4-oxo-1,4-dihydroquinoline-3-carboxylic acid             |  | Idem                                                                                                                                                                                                                                                                                    |
| Inact9 | 1-ethyl-6-fluoro-7-(4-(5-(2-nitrophenyl)-1,3,4-thiadiazol-2-yl)piperazin-1-yl)-4-oxo-1,4-dihydroquinoline-3-carboxylic acid                                 |  | Foroumadi A, Soltani F, Moshafi MH, Ashraf-Askari R. Synthesis and in vitro antibacterial activity of some N-(5-aryl-1,3,4-thiadiazole-2-yl)piperazinyl quinolone derivatives.                                                                                                          |

|         |                                                                                                                                      |                                                                                      |                                     |
|---------|--------------------------------------------------------------------------------------------------------------------------------------|--------------------------------------------------------------------------------------|-------------------------------------|
|         |                                                                                                                                      |                                                                                      | Farmaco. 2003;<br>58(10):1023-1028. |
| Inact10 | 1-ethyl-6-fluoro-7-(4-(5-(2-nitrophenyl)-1,3,4-thiadiazol-2-yl)piperazin-1-yl)-4-oxo-1,4-dihydro-1,8-naphthyridine-3-carboxylic acid | 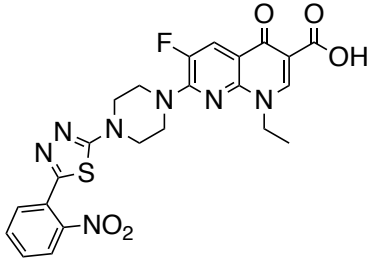   | Idem                                |
| Inact11 | 1-cyclopropyl-6-fluoro-7-(4-(5-(3-nitrophenyl)-1,3,4-thiadiazol-2-yl)piperazin-1-yl)-4-oxo-1,4-dihydroquinoline-3-carboxylic acid    |    | Idem                                |
| Inact12 | 1-ethyl-6-fluoro-7-(4-(5-(3-nitrophenyl)-1,3,4-thiadiazol-2-yl)piperazin-1-yl)-4-oxo-1,4-dihydroquinoline-3-carboxylic acid          |   | Idem                                |
| Inact13 | 1-ethyl-6-fluoro-7-(4-(5-(3-nitrophenyl)-1,3,4-thiadiazol-2-yl)piperazin-1-yl)-4-oxo-1,4-dihydro-1,8-naphthyridine-3-carboxylic acid |  | Idem                                |
| Inact14 | 1-cyclopropyl-6-fluoro-7-(4-(5-(4-nitrophenyl)-1,3,4-thiadiazol-2-yl)piperazin-1-yl)-4-oxo-1,4-dihydroquinoline-3-carboxylic acid    |  | Idem                                |
| Inact15 | 1-ethyl-6-fluoro-7-(4-(5-(4-nitrophenyl)-1,3,4-thiadiazol-2-yl)piperazin-1-yl)-4-oxo-1,4-dihydroquinoline-3-carboxylic acid          |  | Idem                                |

|         |                                                                                                                                              |                                                                                      |                                                                                                                                                                                                |
|---------|----------------------------------------------------------------------------------------------------------------------------------------------|--------------------------------------------------------------------------------------|------------------------------------------------------------------------------------------------------------------------------------------------------------------------------------------------|
| Inact16 | 1-ethyl-6-fluoro-7-(4-(5-(4-nitrophenyl)-1,3,4-thiadiazol-2-yl)piperazin-1-yl)-4-oxo-1,4-dihydro-1,8-naphthyridine-3-carboxylic acid         | 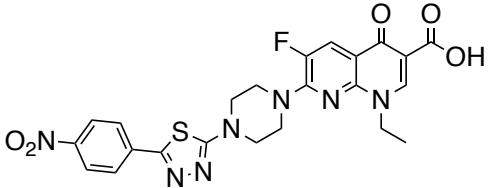   | Idem                                                                                                                                                                                           |
| Inact17 | 1-cyclopropyl-6-fluoro-7-(4-(2-((6-nitrobenzo[d]thiazol-2-yl)amino)-2-oxoethyl)piperazin-1-yl)-4-oxo-1,4-dihydroquinoline-3-carboxylic acid  |    | Sharma PC, Kumar R, Chaudhary M, Sharma A, Rajak H. Synthesis and biological evaluation of novel benzothiazole clubbed fluoroquinolone derivatives. J Enzyme Inhib Med Chem. 2013; 28(1):1-10. |
| Inact18 | 1-cyclopropyl-6-fluoro-7-(4-(2-((6-methylbenzo[d]thiazol-2-yl)amino)-2-oxoethyl)piperazin-1-yl)-4-oxo-1,4-dihydroquinoline-3-carboxylic acid |   | Idem                                                                                                                                                                                           |
| Inact19 | 1-cyclopropyl-6-fluoro-7-(4-(2-((6-fluorobenzo[d]thiazol-2-yl)amino)-2-oxoethyl)piperazin-1-yl)-4-oxo-1,4-dihydroquinoline-3-carboxylic acid |  | Idem                                                                                                                                                                                           |
| Inact20 | 7-(4-(2-((6-chlorobenzo[d]thiazol-2-yl)amino)-2-oxoethyl)piperazin-1-yl)-1-ethyl-6-fluoro-4-oxo-1,4-dihydroquinoline-3-carboxylic acid       |  | Idem                                                                                                                                                                                           |
| Inact21 | 7-(4-(2-((5,7-dichlorobenzo[d]thiazol-2-yl)amino)-2-oxoethyl)piperazin-1-yl)-1-ethyl-6-fluoro-4-oxo-1,4-dihydroquinoline-3-carboxylic acid   |  | Idem                                                                                                                                                                                           |
| Inact22 | 1-ethyl-6-fluoro-7-(4-(2-((6-nitrobenzo[d]thiazol-2-yl)amino)-2-oxoethyl)piperazin-1-yl)-4-oxo-1,4-dihydroquinoline-3-carboxylic acid        |  | Idem                                                                                                                                                                                           |

|         |                                                                                                                                                                     |  |      |
|---------|---------------------------------------------------------------------------------------------------------------------------------------------------------------------|--|------|
| Inact23 | 1-ethyl-6-fluoro-7-(4-(2-((4-methylbenzo[d]thiazol-2-yl)amino)-2-oxoethyl)piperazin-1-yl)-4-oxo-1,4-dihydroquinoline-3-carboxylic acid                              |  | Idem |
| Inact24 | 1-ethyl-6-fluoro-7-(4-(2-((4-fluorobenzo[d]thiazol-2-yl)amino)-2-oxoethyl)piperazin-1-yl)-4-oxo-1,4-dihydroquinoline-3-carboxylic acid                              |  | Idem |
| Inact25 | 7-(4-(2-((4-chlorobenzo[d]thiazol-2-yl)amino)-2-oxoethyl)-3-methylpiperazin-1-yl)-1-cyclopropyl-6-fluoro-8-methoxy-4-oxo-1,4-dihydroquinoline-3-carboxylic acid     |  | Idem |
| Inact26 | 1-cyclopropyl-7-(4-(2-((6,7-dichlorobenzo[d]thiazol-2-yl)amino)-2-oxoethyl)-3-methylpiperazin-1-yl)-6-fluoro-8-methoxy-4-oxo-1,4-dihydroquinoline-3-carboxylic acid |  | Idem |
| Inact27 | 1-cyclopropyl-6-fluoro-8-methoxy-7-(3-methyl-4-(2-((4-nitrobenzo[d]thiazol-2-yl)amino)-2-oxoethyl)piperazin-1-yl)-4-oxo-1,4-dihydroquinoline-3-carboxylic acid      |  | Idem |
| Inact28 | 1-cyclopropyl-6-fluoro-8-methoxy-7-(3-methyl-4-(2-((4-methylbenzo[d]thiazol-2-yl)amino)-2-oxoethyl)piperazin-1-yl)-4-oxo-1,4-dihydroquinoline-3-carboxylic acid     |  | Idem |
| Inact29 | 1-cyclopropyl-6-fluoro-7-(4-(2-((4-fluorobenzo[d]thiazol-2-yl)amino)-2-oxoethyl)-3-methylpiperazin-1-yl)-8-methoxy-4-oxo-1,4-dihydroquinoline-3-carboxylic acid     |  | Idem |

|         |                                                                                                                                              |                                                                                      |                                                                                                                                                                                                             |
|---------|----------------------------------------------------------------------------------------------------------------------------------------------|--------------------------------------------------------------------------------------|-------------------------------------------------------------------------------------------------------------------------------------------------------------------------------------------------------------|
| Inact30 | (Z)-7-(3-(aminomethyl)-4-(ethoxyimino)-3-methylpiperidin-1-yl)-1-ethyl-6,8-difluoro-4-oxo-1,4-dihydroquinoline-3-carboxylic acid             | 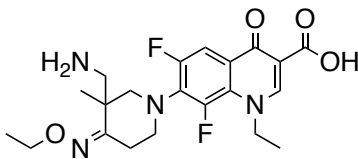   | Chai Y, Liu M, Wang B, et al. Synthesis and in vitro antibacterial activity of novel fluoroquinolone derivatives containing substituted piperidines. Bioorg Med Chem Lett. 2010; 20(17):5195-5198.          |
| Inact31 | (Z)-7-(3-(aminomethyl)-4-(ethoxyimino)-3-methylpiperidin-1-yl)-6,8-difluoro-1-(2-fluoroethyl)-4-oxo-1,4-dihydroquinoline-3-carboxylic acid   |    | Idem                                                                                                                                                                                                        |
| Inact32 | (Z)-7-(3-(aminomethyl)-4-(ethoxyimino)-3-methylpiperidin-1-yl)-1-cyclopropyl-6-fluoro-8-methoxy-4-oxo-1,4-dihydroquinoline-3-carboxylic acid |   | Idem                                                                                                                                                                                                        |
| Inact33 | 7-(4-cyclopentylpiperazin-1-yl)-1-ethyl-6-fluoro-4-oxo-1,4-dihydroquinoline-3-carboxylic acid                                                |  | Abuo-Rahma Gel-D, Sarhan HA, Gad GF. Design, synthesis, antibacterial activity and physicochemical parameters of novel N-4-piperazinyl derivatives of norfloxacin. Bioorg Med Chem. 2009; 17(11):3879-3886. |
| Inact34 | 7-(4-(5,6-diphenyl-1,2,4-triazin-3-yl)piperazin-1-yl)-1-ethyl-6-fluoro-4-oxo-1,4-dihydroquinoline-3-carboxylic acid                          |  | Idem                                                                                                                                                                                                        |
| Inact35 | 7-(4-((dimorpholinoamino)methyl)piperazin-1-yl)-1-ethyl-6-fluoro-4-oxo-1,4-dihydroquinoline-3-carboxylic acid                                |  | Idem                                                                                                                                                                                                        |

|             |                                                                                                                               |                                                                                     |                                                                                                                                                                             |
|-------------|-------------------------------------------------------------------------------------------------------------------------------|-------------------------------------------------------------------------------------|-----------------------------------------------------------------------------------------------------------------------------------------------------------------------------|
| Inact36     | 7-(4-((bis(1,3-dioxoisindolin-2-yl)amino)methyl)piperazin-1-yl)-1-ethyl-6-fluoro-4-oxo-1,4-dihydroquinoline-3-carboxylic acid | 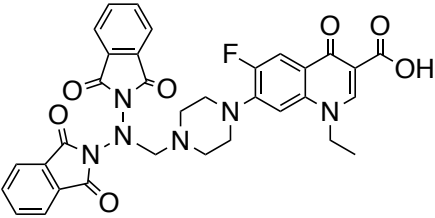  | Idem                                                                                                                                                                        |
| PGE-5215205 | 1-methyl-4-oxo-1,4-dihydroquinoline-3-carboxylic acid                                                                         |   | Macinga DR, Renick PJ, Makin KM, et al. Unique biological properties and molecular mechanism of 5,6-bridged quinolones. Antimicrob Agents Chemother. 2003; 47(8):2526-2537. |
| PGE-6116532 | 7,8-dimethyl-10-oxo-7,10-dihydro-1 <i>H</i> -[1,3]dioxino[5,4- <i>f</i> ]quinoline-9-carboxylic acid                          |   | Idem                                                                                                                                                                        |
| PGE-9604297 | 1-ethyl-4-oxo-1,4-dihydroquinoline-3-carboxylic acid                                                                          |  | Idem                                                                                                                                                                        |
