# Supplementary material
Source: MDPI journal article supplement (https://www.mdpi.com/1424-8247/13/12/431)

Probability distribution diagrams of the analyzed discrete indexes.

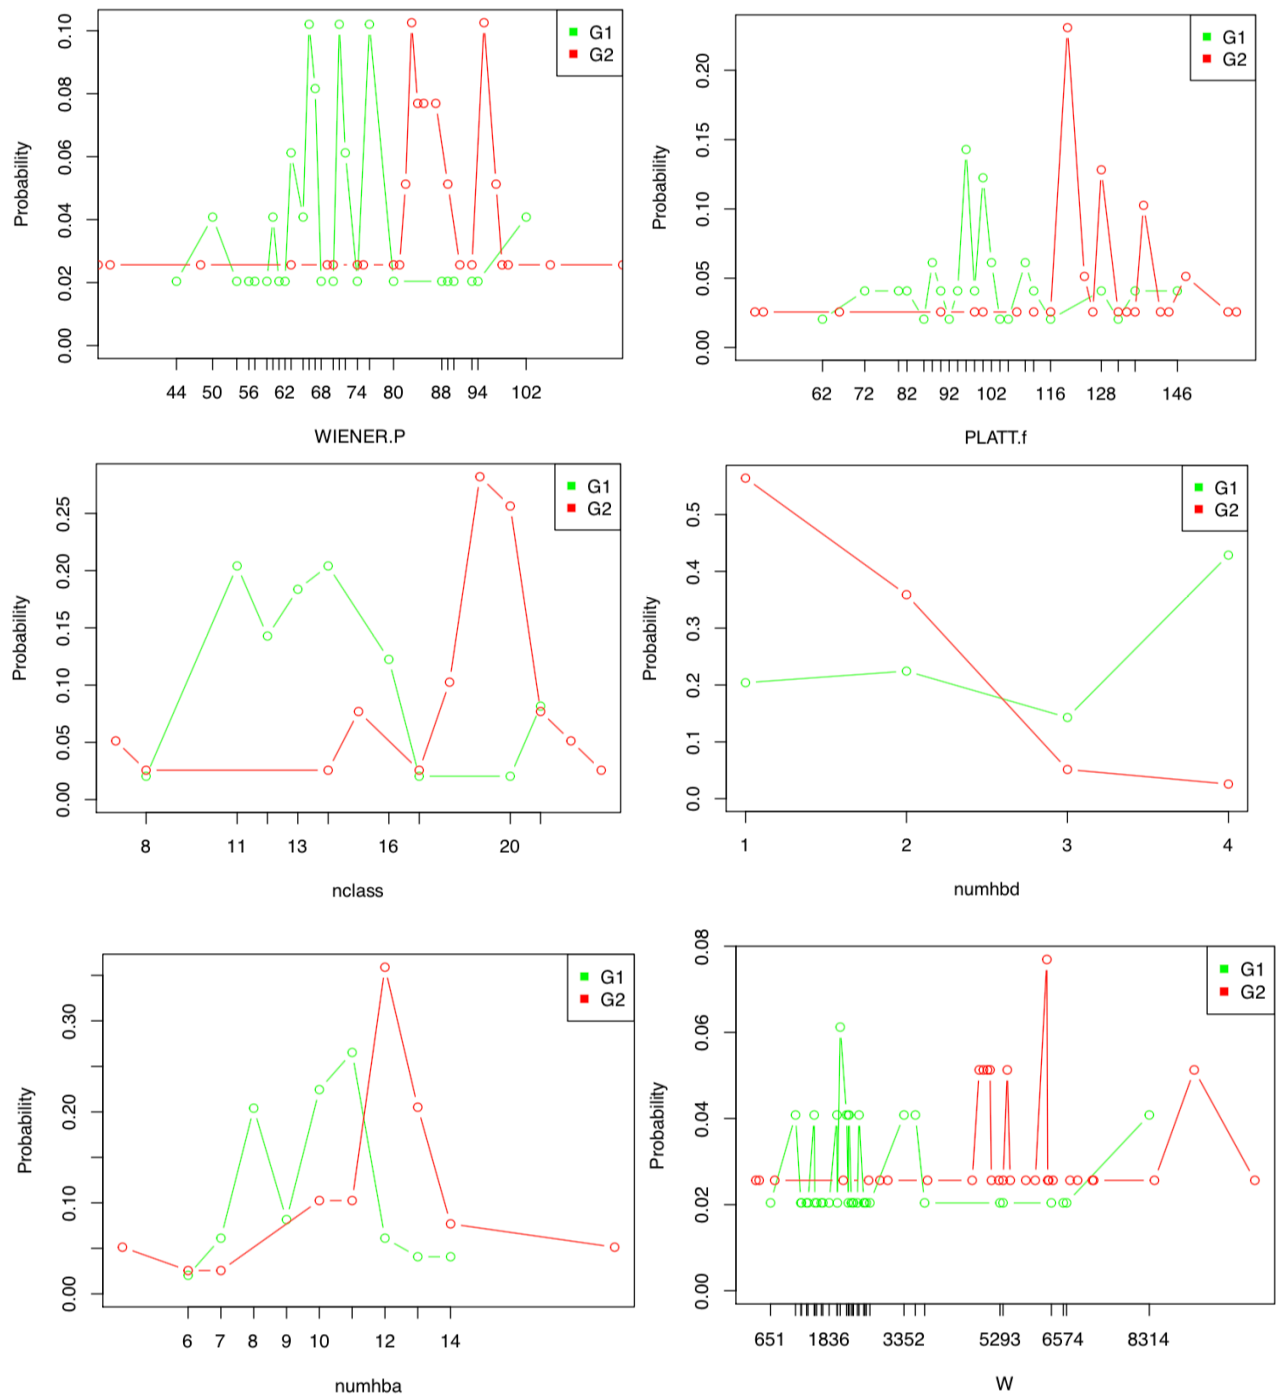

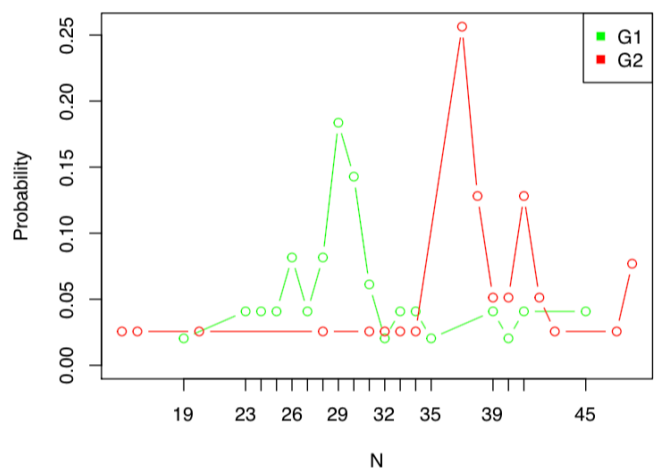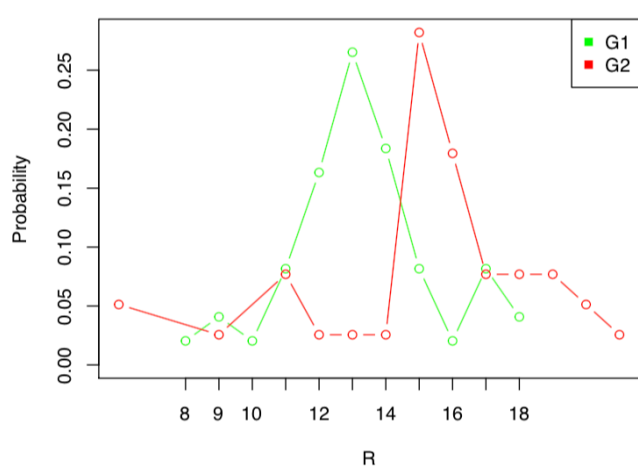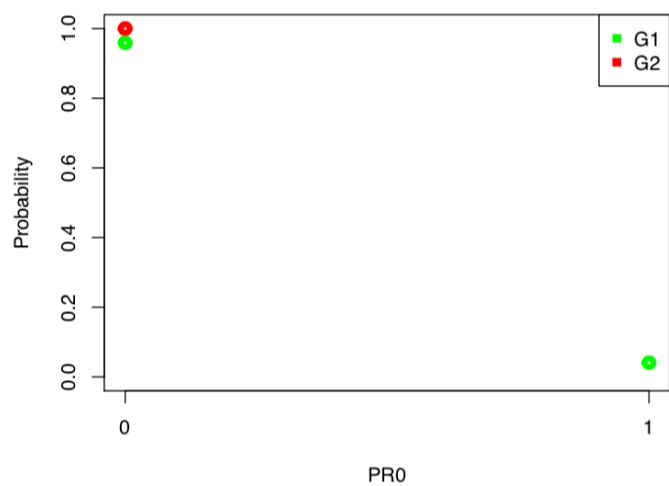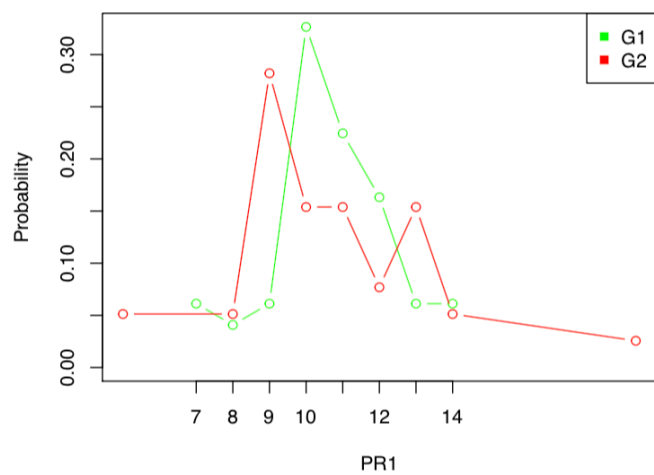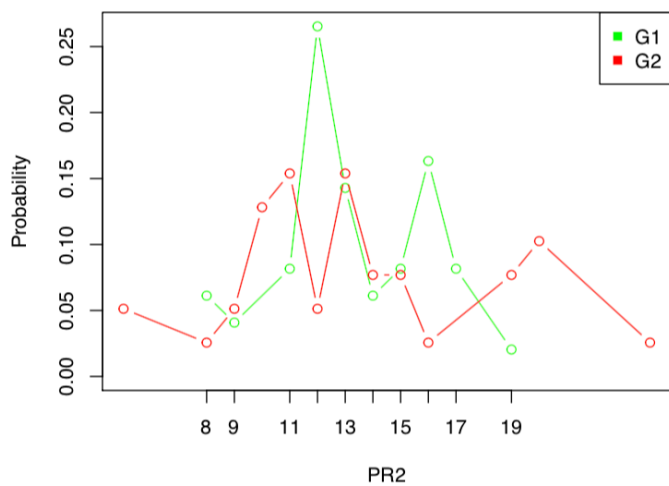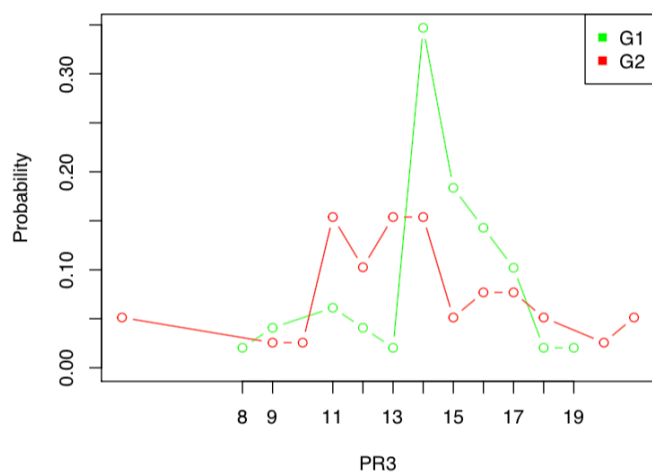

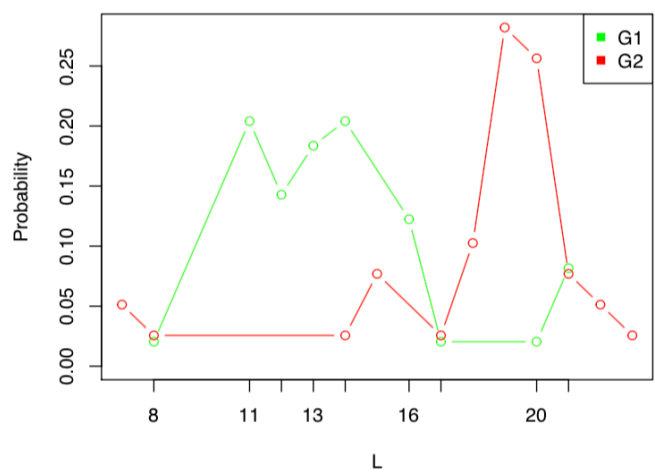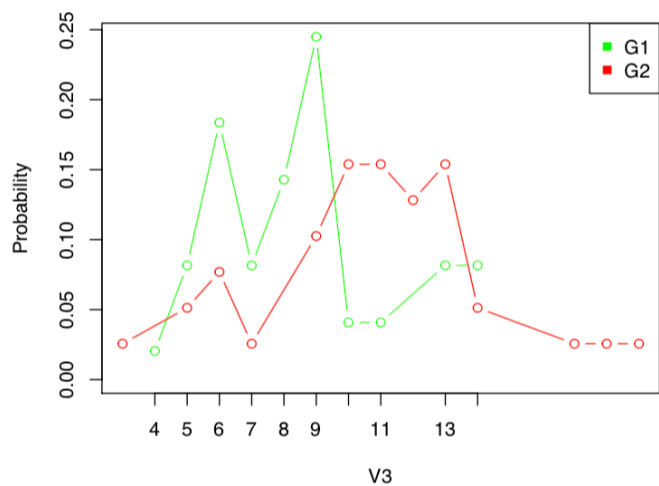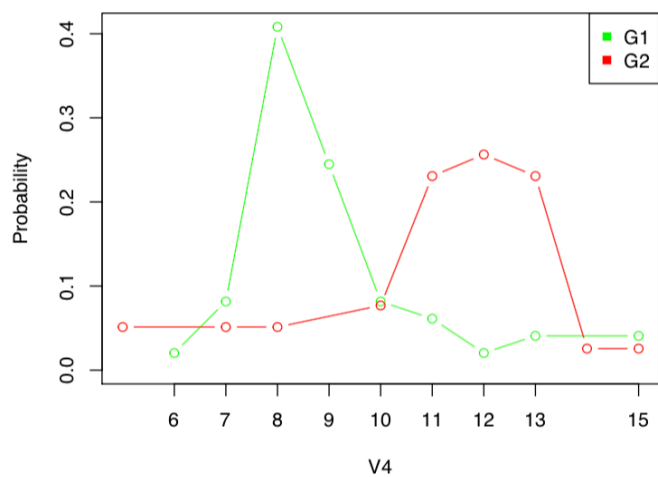

Supplement: s1 [file s1]
